# Supplementary material
Source: publisher figshare collection journal article supplement (https://frontiersin.figshare.com/ndownloader/files/13853417)
Supplement: Supplementary file [file 13853417]

Figure S2

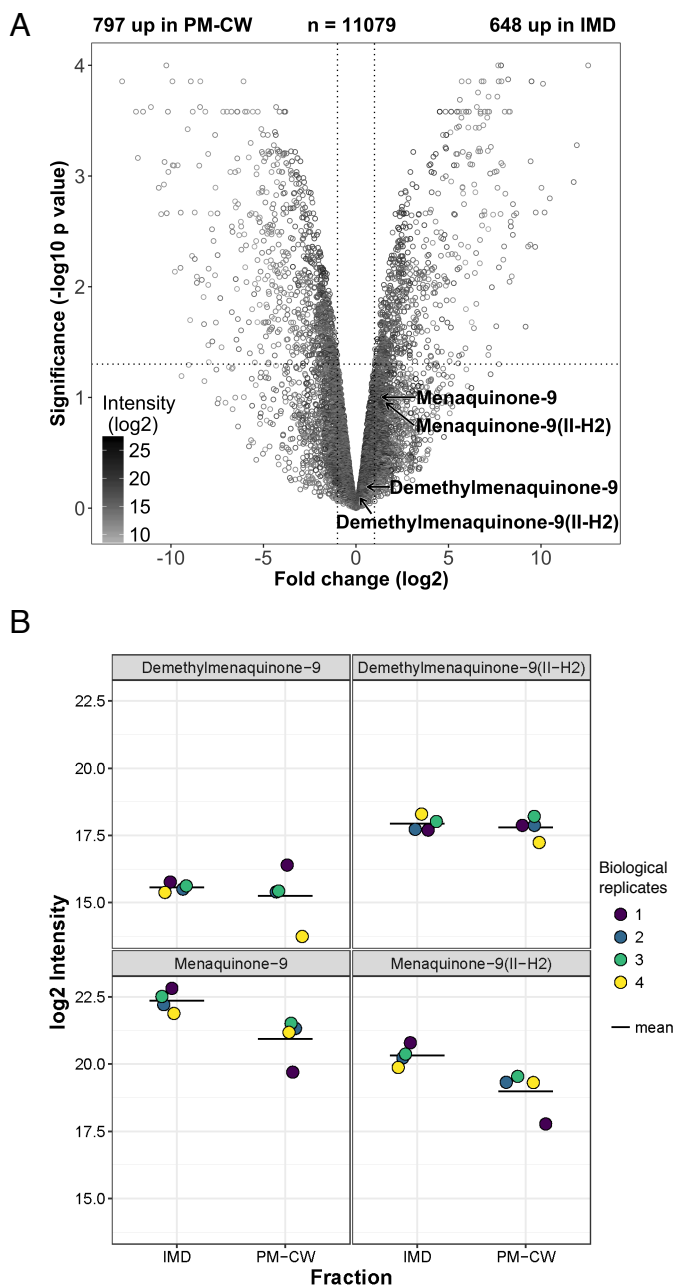

Figure S2

C

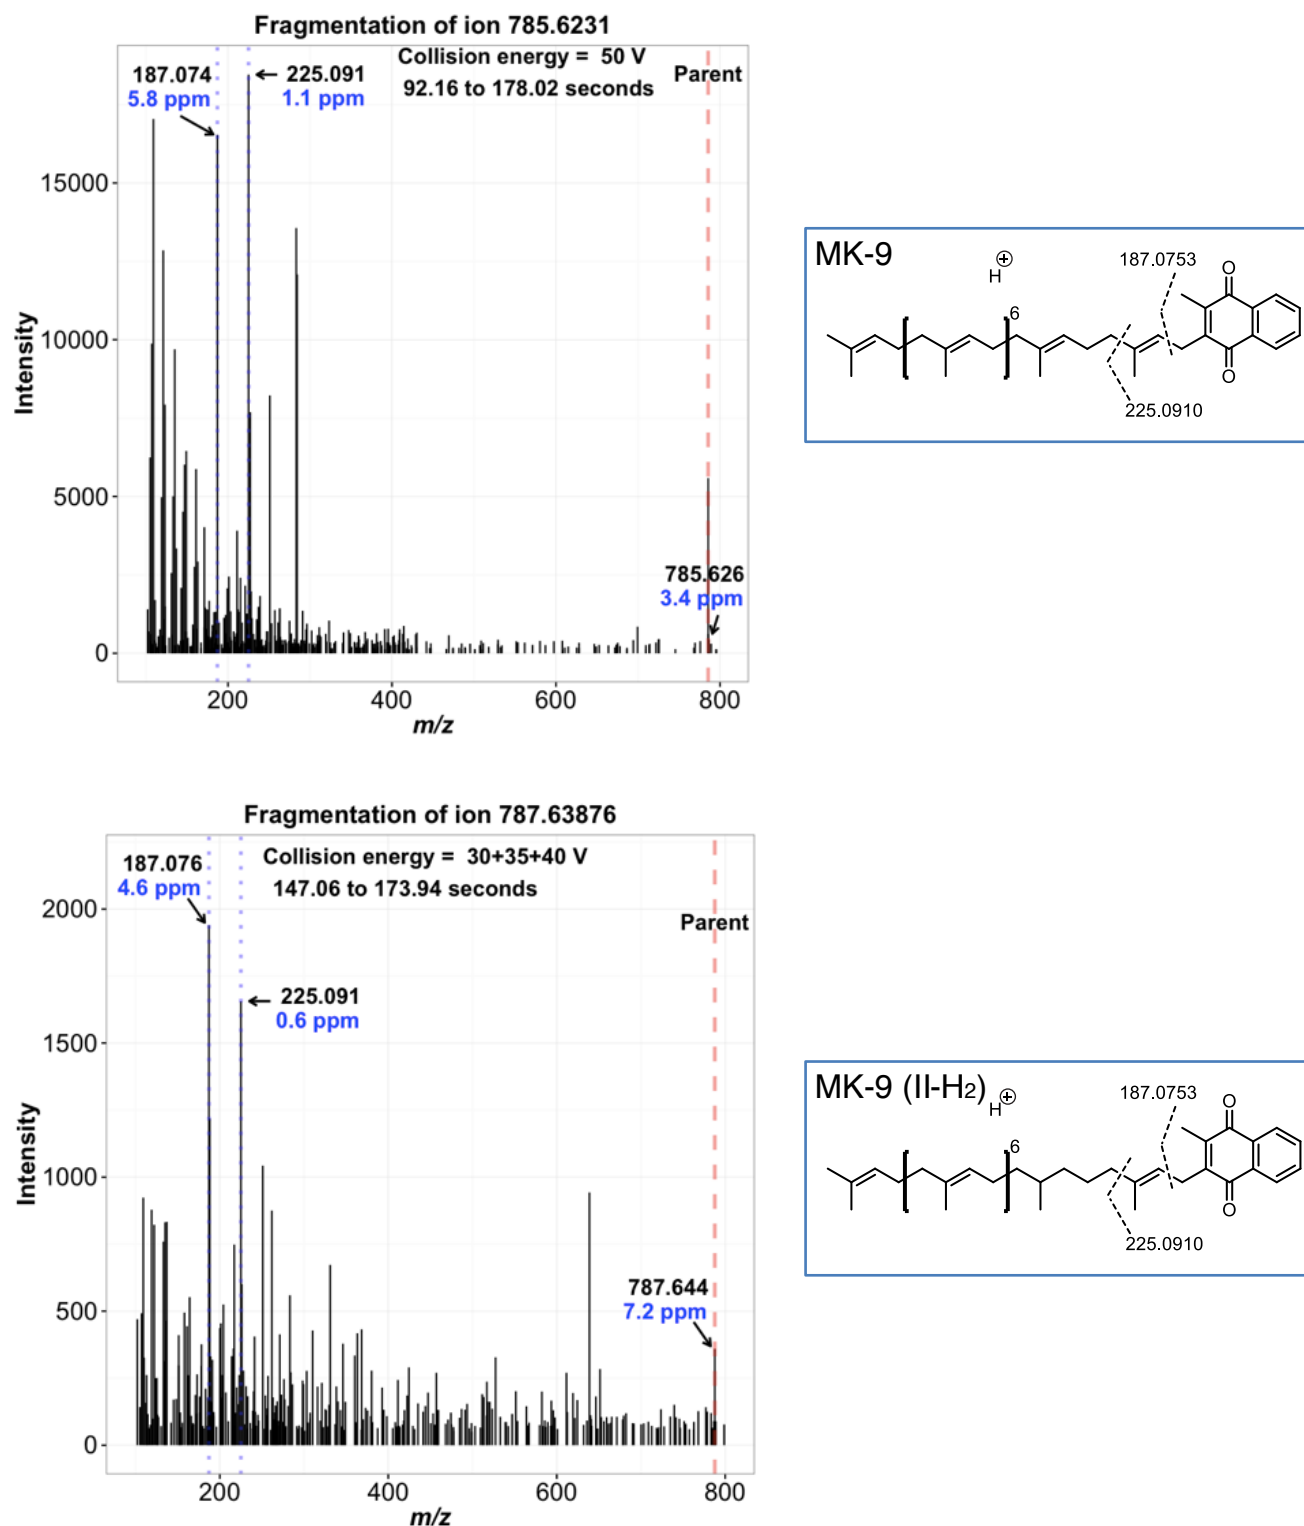

**Figure S2.** The subcellular distribution of menaquinone species. (A) Volcano plot of ions detected after lipidomic profiling of IMD and PM-CW by HPLC-MS. The major menaquinone species, MK-9 (II-H<sub>2</sub>) and MK-9 are slightly enriched in the IMD. DMK-9 (II-H<sub>2</sub>) and DMK-9 are found more evenly distributed between the IMD and PM-CW. IMD, intracellular membrane domain. PM-CW, plasma membrane associated with cell wall. MK, menaquinone. DMK, demethylmenaquinone. (B) Intensity plot of MK-9 species between the IMD and PM-CW. DMK-9 and DMK-9 (II-H<sub>2</sub>) are equally present in both fractions and MK-9 and MK-9 (II-H<sub>2</sub>) species are slightly enriched in the IMD. (C) Collision-induced dissociation mass spectroscopy for MK-9 and MK-9 (II-H<sub>2</sub>).
